# Supplementary material for: Vitamin D levels and risk of type 1 diabetes: A Mendelian randomization study
Source: PLoS Med. 2021 Feb 25;18(2):e1003536. doi: 10.1371/journal.pmed.1003536 (PMC7906317; doi:10.1371/journal.pmed.1003536)
Supplement: S3 Table — (XLSX) [file pmed.1003536.s004.xlsx]

## Sheet: Sheet1
S3 Table: Horizontal pleiotropy assessment using MR-PRESSO for the vitamin D-type 1 diabetes MR
global test: detection of horizontal pleiotropy ; outlier-test: correction of horizontal pleiotropy via outlier removal; distortion test: testing of significant distortion in the causal estimates before and after outlier removal
Main MR results before and after outlier removal (n=1)
MR Analysis	Causal Estimate	Sd	T-stat	P-value	global test RSSobs	global test p-value	distortion coefficient	distortion test p-value
Raw	0.0886537	0.124943	0.70955	0.480409	116.338	0.001	-19.2431	0.849
Outlier-corrected	0.109778	0.115981	0.946521	0.347284
Pleiotropy coefficients per SNP
SNP	RSSobs	Pvalue
rs6698680	0.00251637	1
rs3750296	0.00102865	1
rs7519574	0.00126684	1
rs56044892	0.00163463	1
rs2934744	0.00161932	1
rs7528419	0.00319884	1
rs3768013	0.000314522	1
rs144613541	0.000807215	1
rs11264360	0.000813052	1
rs867772	0.00510284	0.345
rs10127775	8.25374e-05	1
rs12997242	3.43201e-06	1
rs11127048	0.00100884	1
rs6724965	0.00514205	1
rs7569755	2.27695e-05	1
rs1047891	5.05002e-06	1
rs2011425	0.00189595	1
rs7650253	0.000216666	1
rs1972994	0.00181562	1
rs6438900	0.00243689	1
rs6773343	6.18713e-05	1
rs78649910	1.64056e-07	1
rs7699711	0.00039463	1
rs11723621	0.000205381	1
rs58073039	0.00154822	1
rs7718395	3.80447e-05	1
rs3822868	0.000325263	1
rs111529171	1.88411e-05	1
rs1011468	8.59917e-05	1
rs1858889	6.68608e-05	1
rs804280	0.0100856	<0.0345
rs34726834	0.000890044	1
rs7828742	0.00103701	1
rs10818769	0.00320729	1
rs532436	0.00487663	1
rs10887718	2.57731e-05	1
rs10832289	0.0013007	1
rs523583	0.000480574	1
rs12803256	0.00228669	1
rs1149605	2.85724e-06	1
rs964184	0.000564555	1
rs2847500	0.000796289	1
rs12317268	0.000267851	1
rs9668081	4.83553e-05	1
rs10859995	0.000792439	1
rs8018720	0.00257056	1
rs261291	2.58708e-05	1
rs1800588	0.000138351	1
rs17765311	0.00163746	1
rs62007299	5.27188e-05	1
rs8063706	8.41314e-05	1
rs77924615	0.000599435	1
rs71383766	4.71458e-05	1
rs1800775	0.00157438	1
rs2909218	2.28601e-06	1
rs8091117	0.0017834	1
rs2037511	0.000304915	1
rs57631352	0.00138484	1
rs73015021	0.00869804	0.966
rs58542926	0.000358354	1
rs3814995	0.00275121	1
rs157595	0.000185586	1
rs112285002	0.00625973	1
rs10426	0.00125278	1
rs8103262	2.36002e-05	1
rs6127099	0.00147025	1
rs2229742	0.00050166	1
rs2074735	0.00653931	1
rs960596	0.000483268	1
